# Supplementary material for: Molecular dynamics simulations of amino acid adsorption and transport at the acetonitrile–water–silica interface: the role of side chains
Source: Royal Society of Chemistry journal article supplement (doi:10.1039/d1ra03982b), 2021-01-01
Supplement: d1ra03982b1.pdf [file d1ra03982b1.pdf]

# Supplementary Information for: Molecular Dynamics Simulations of Amino Acid Adsorption and Transport at Acetonitrile-Water-Silica Interface: the Role of Side Chains

*Yong-Peng Wang, Fei Liang and Shule Liu\**

School of Materials Science and Engineering and Key Laboratory for Polymeric Composite & Functional Materials of Ministry of Education, Sun Yat-sen University,

Guangzhou 510275, P. R. China

Email: [liushle@mail.sysu.edu.cn](mailto:liushle@mail.sysu.edu.cn)

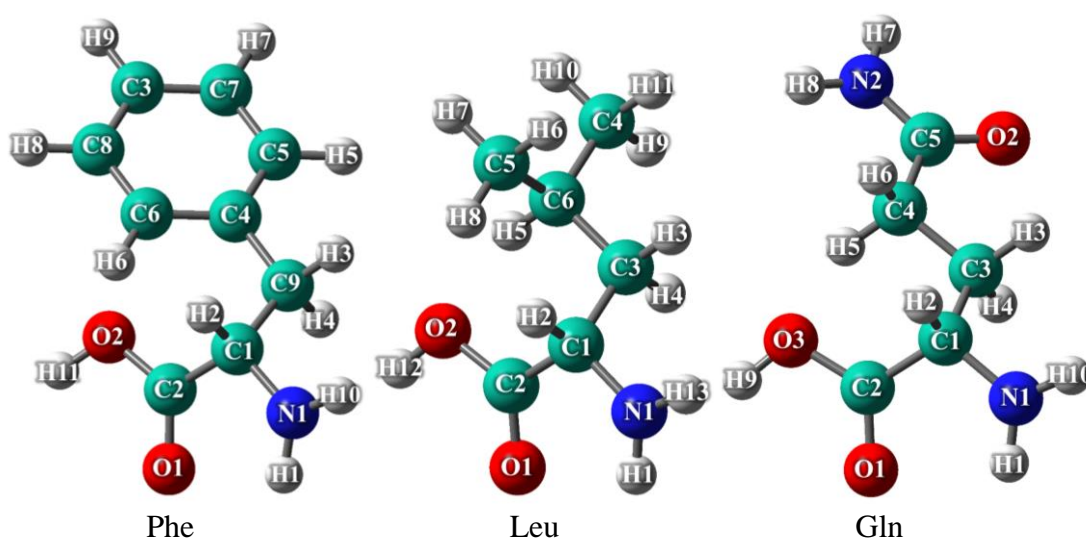

Figure S1. The schematic diagram of amino acid molecules with number labels used in Table S1, S2 and S3 as well as in the definition of intramolecular vectors in Fig. 1a of the manuscript.

**Table S1.** Nonbonding Force Field Parameters for Phe<sup>1</sup>

| <b>Phenylalanine (Phe)</b> |                            |                                             |                                             |
|----------------------------|----------------------------|---------------------------------------------|---------------------------------------------|
| <b>Atom</b>                | <b><math>q(e_0)</math></b> | <b><math>\epsilon_{LJ}(kcal/mol)</math></b> | <b><math>\sigma_{LJ}(\text{\AA})</math></b> |
| N1                         | -0.9038                    | 0.1700                                      | 3.25000                                     |
| O1                         | -0.5480                    | 0.2100                                      | 2.95992                                     |
| O2                         | -0.6041                    | 0.2104                                      | 3.06647                                     |
| C1                         | 0.1325                     | 0.1094                                      | 3.39967                                     |
| C2                         | 0.6401                     | 0.0860                                      | 3.39967                                     |
| C3                         | -0.1280                    | 0.0860                                      | 3.39967                                     |
| C4                         | -0.0903                    | 0.0860                                      | 3.39967                                     |
| C5                         | -0.1270                    | 0.0860                                      | 3.39967                                     |
| C6                         | -0.1270                    | 0.0860                                      | 3.39967                                     |
| C7                         | -0.1265                    | 0.0860                                      | 3.39967                                     |
| C8                         | -0.1265                    | 0.0860                                      | 3.39967                                     |
| C9                         | -0.0721                    | 0.1094                                      | 3.39967                                     |
| H1                         | 0.3658                     | 0.0157                                      | 1.06908                                     |
| H2                         | 0.1037                     | 0.0157                                      | 2.47135                                     |
| H3                         | 0.0627                     | 0.0157                                      | 2.64953                                     |
| H4                         | 0.0627                     | 0.0157                                      | 2.64953                                     |
| H5                         | 0.1375                     | 0.0150                                      | 2.59964                                     |
| H6                         | 0.1375                     | 0.0150                                      | 2.59964                                     |
| H7                         | 0.1330                     | 0.0150                                      | 2.59964                                     |
| H8                         | 0.1330                     | 0.0150                                      | 2.59964                                     |
| H9                         | 0.1330                     | 0.0150                                      | 2.59964                                     |
| H10                        | 0.3658                     | 0.0157                                      | 1.06908                                     |
| H11                        | 0.4460                     | 0.0000                                      | 0.00000                                     |

**Table S2.** Nonbonding Force Field Parameters for Leu<sup>1</sup>

| <b>Leucine (Leu)</b> |                            |                                             |                                             |
|----------------------|----------------------------|---------------------------------------------|---------------------------------------------|
| <b>Atom</b>          | <b><math>q(e_0)</math></b> | <b><math>\epsilon_{LJ}(kcal/mol)</math></b> | <b><math>\sigma_{LJ}(\text{\AA})</math></b> |
| N1                   | -0.9028                    | 0.1700                                      | 3.25000                                     |
| O1                   | -0.5510                    | 0.2100                                      | 2.95992                                     |
| O2                   | -0.6021                    | 0.2104                                      | 3.06647                                     |
| C1                   | 0.1285                     | 0.1094                                      | 3.39967                                     |
| C2                   | 0.6411                     | 0.0860                                      | 3.39967                                     |
| C3                   | -0.1154                    | 0.1094                                      | 3.39967                                     |
| C4                   | -0.0911                    | 0.1094                                      | 3.39967                                     |
| C5                   | -0.0911                    | 0.1094                                      | 3.39967                                     |
| C6                   | -0.0707                    | 0.1094                                      | 3.39967                                     |
| H1                   | 0.3638                     | 0.0157                                      | 1.06908                                     |
| H2                   | 0.0957                     | 0.0157                                      | 2.47135                                     |
| H3                   | 0.0552                     | 0.0157                                      | 2.64953                                     |
| H4                   | 0.0552                     | 0.0157                                      | 2.64953                                     |
| H5                   | 0.0597                     | 0.0157                                      | 2.64953                                     |
| H6                   | 0.036533                   | 0.0157                                      | 2.64953                                     |
| H7                   | 0.036533                   | 0.0157                                      | 2.64953                                     |
| H8                   | 0.036533                   | 0.0157                                      | 2.64953                                     |
| H9                   | 0.036533                   | 0.0157                                      | 2.64953                                     |
| H10                  | 0.036533                   | 0.0157                                      | 2.64953                                     |
| H11                  | 0.036533                   | 0.0157                                      | 2.64953                                     |
| H12                  | 0.4440                     | 0.0000                                      | 0.00000                                     |
| H13                  | 0.3638                     | 0.0157                                      | 1.06908                                     |

**Table S3.** Nonbonding Force Field Parameters for Gln<sup>1</sup>

| <b>Glutamine (Gln)</b> |                            |                                             |                                             |
|------------------------|----------------------------|---------------------------------------------|---------------------------------------------|
| <b>Atom</b>            | <b><math>q(e_0)</math></b> | <b><math>\epsilon_{LJ}(kcal/mol)</math></b> | <b><math>\sigma_{LJ}(\text{\AA})</math></b> |
| N1                     | -0.9018                    | 0.1700                                      | 3.25000                                     |
| N2                     | -0.6780                    | 0.1700                                      | 3.25000                                     |
| O1                     | -0.5420                    | 0.2100                                      | 2.95992                                     |
| O2                     | -0.6141                    | 0.2100                                      | 2.95992                                     |
| O3                     | -0.6101                    | 0.2104                                      | 3.06647                                     |
| C1                     | 0.1315                     | 0.1094                                      | 3.39967                                     |
| C2                     | 0.6361                     | 0.0860                                      | 3.39967                                     |
| C3                     | -0.1124                    | 0.1094                                      | 3.39967                                     |
| C4                     | -0.1524                    | 0.1094                                      | 3.39967                                     |
| C5                     | 0.6571                     | 0.0860                                      | 3.39967                                     |
| H1                     | 0.3673                     | 0.0157                                      | 1.06908                                     |
| H2                     | 0.0917                     | 0.0157                                      | 2.47135                                     |
| H3                     | 0.0737                     | 0.0157                                      | 2.64953                                     |
| H4                     | 0.0737                     | 0.0157                                      | 2.64953                                     |
| H5                     | 0.0702                     | 0.0157                                      | 2.64953                                     |
| H6                     | 0.0702                     | 0.0157                                      | 2.64953                                     |
| H7                     | 0.3125                     | 0.0157                                      | 1.06908                                     |
| H8                     | 0.3125                     | 0.0157                                      | 1.06908                                     |
| H9                     | 0.4460                     | 0.0000                                      | 0.00000                                     |
| H10                    | 0.3673                     | 0.0157                                      | 1.06908                                     |

**Table S4.** Nonbonding Force Field Parameters for ACN<sup>2</sup>, Water<sup>3</sup> and Silica<sup>4</sup>

| Molecule | Atom         | $q(e_0)$ | $\epsilon_{LJ}(kcal/mol)$ | $\sigma_{LJ}(\text{\AA})$ |
|----------|--------------|----------|---------------------------|---------------------------|
| ACN      | N (ACN)      | -0.5126  | 0.1331                    | 3.0112                    |
|          | C (cyano)    | 0.4617   | 0.1341                    | 3.5458                    |
|          | C (methyl)   | -0.5503  | 0.1094                    | 3.3997                    |
|          | H (ACN)      | 0.1904   | 0.0157                    | 2.6495                    |
| water    | O (water)    | -0.8340  | 0.1521                    | 3.1506                    |
|          | H (water)    | 0.4170   | 0.0000                    | 0.0000                    |
| silica   | H (Silanol)  | 0.4000   | 0.0000                    | 0.0000                    |
|          | O (Silanol)  | -0.7100  | 0.1550                    | 3.1540                    |
|          | Si (Silanol) | 0.3100   | 0.1275                    | 3.7950                    |
|          | O (wall)     | 0.0000   | 0.1550                    | 3.1540                    |
|          | Si (wall)    | 0.0000   | 0.1275                    | 3.7950                    |

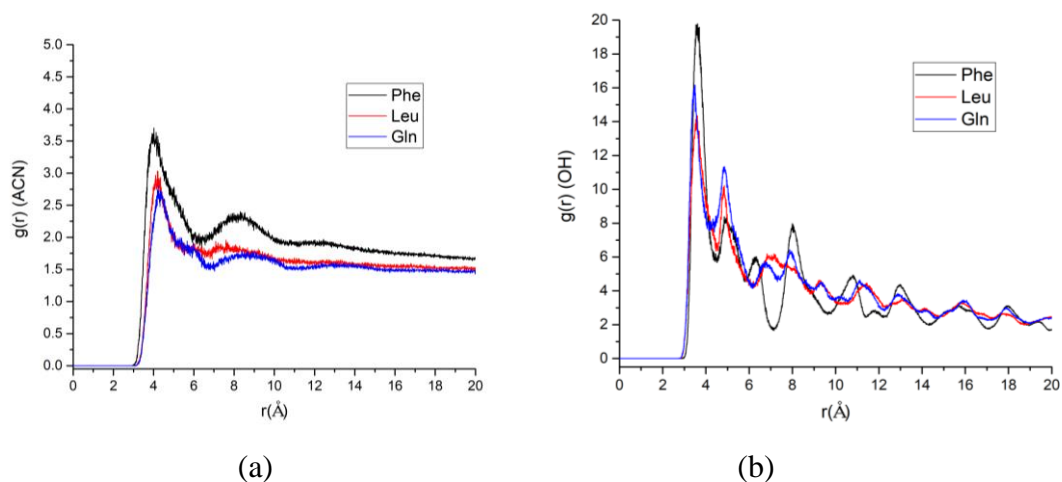

Figure S2. (a) The radial distribution function of ACN at the most stabilized state of each amino acid as the function of the distance between the  $\beta$ -C atom of each amino acid and methyl carbon atoms from ACN molecules. (b) The radial distribution function of hydroxyl groups in solvent system (water molecules and silanol groups) at the most stabilized state of each amino acid as the distance between the  $\alpha$ -C atom of each amino acids and oxygen atoms of hydroxyl groups.

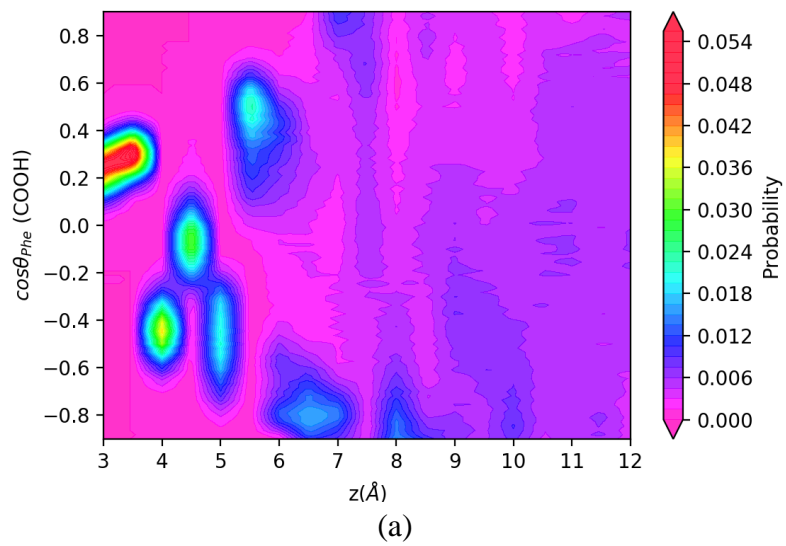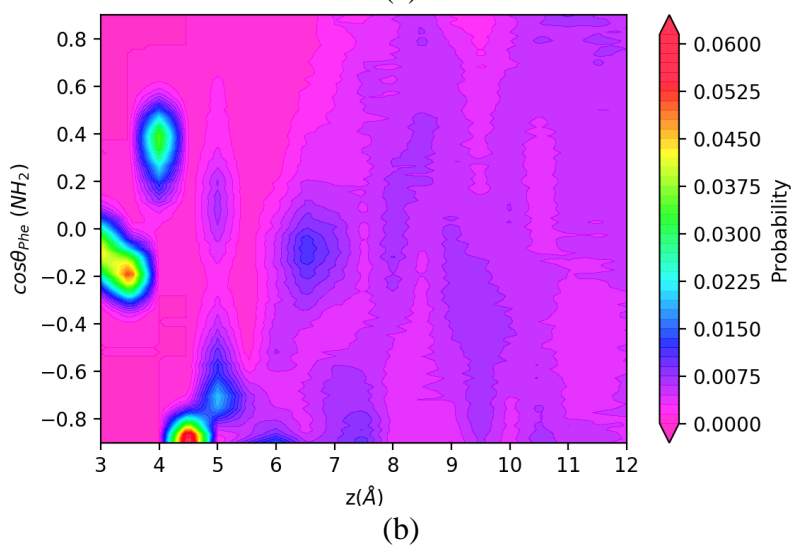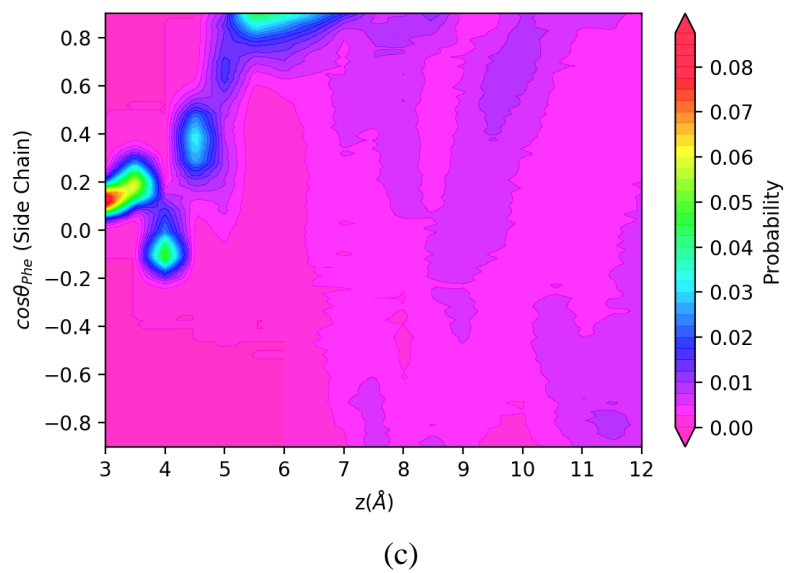

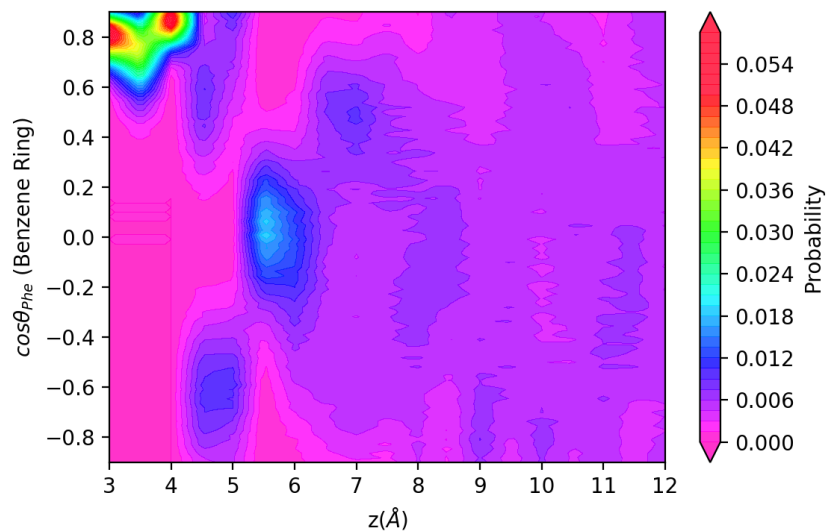

(d)

Figure S3. The orientation distribution of the Phe molecule's (a)  $C_1$ - $C_2$  vector:  $\alpha$ -carbon atom  $C_1$  pointing towards the  $C_2$  atom of the carboxyl group, (b)  $C_1$ - $N_1$  vector:  $\alpha$ -carbon atom  $C_1$  pointing towards the  $N_1$  atom of the amino group, (c)  $C_1$ - $C_3$  vector:  $\alpha$ -carbon atom  $C_1$  pointing towards the  $C_3$  atom of phenyl side chain group and (d) the normal vector of the benzene ring as a function of the center-of-mass distance from the silica surface. This figure is plotted by combining the corresponding orientation distribution profiles in all umbrella sampling windows.

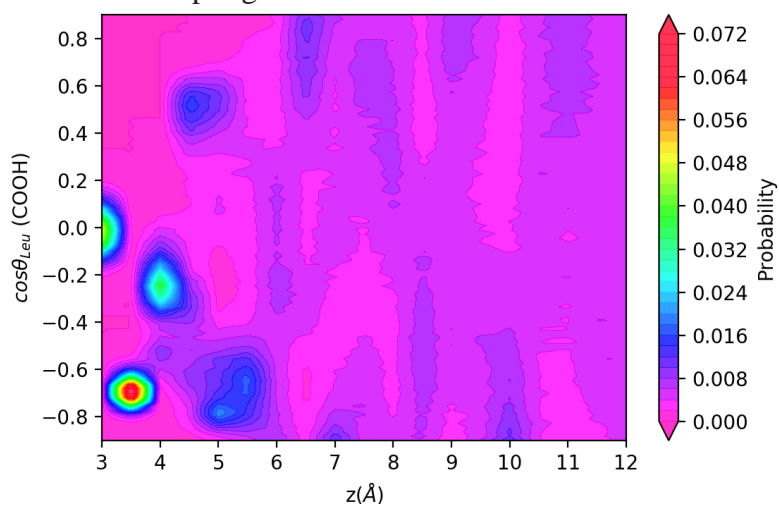

(a)

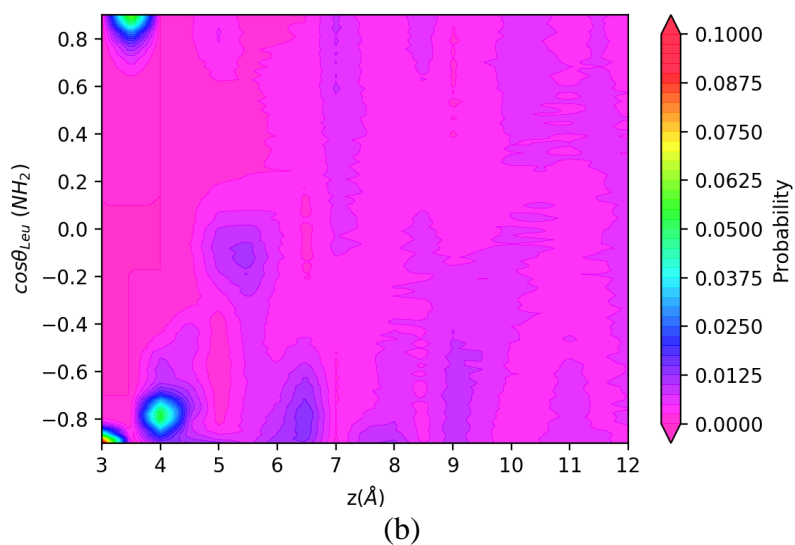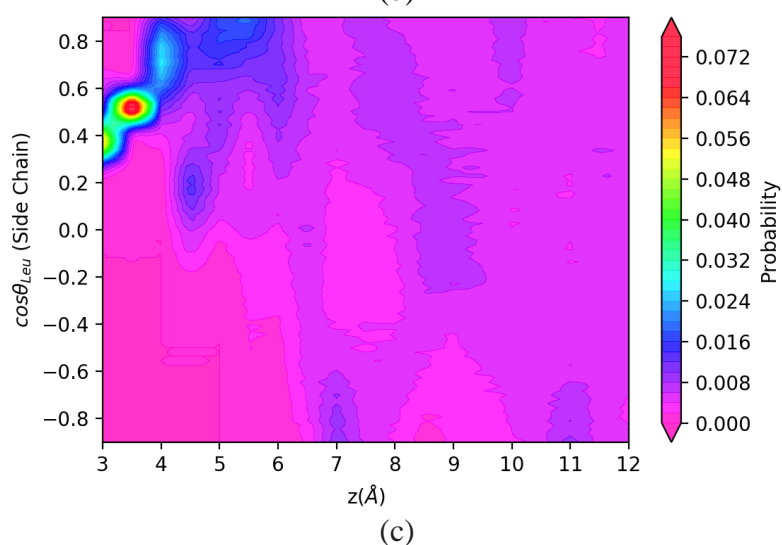

Figure S4. The orientation distribution of the Leu molecule's (a)  $C_1$ - $C_2$  vector:  $\alpha$ -carbon atom  $C_1$  pointing towards the  $C_2$  atom of the carboxyl group, (b)  $C_1$ - $N_1$  vector:  $\alpha$ -carbon atom  $C_1$  pointing towards the  $N_1$  atom of the amino group and (c)  $C_1$ - $C_4$  vector:  $\alpha$ -carbon atom  $C_1$  pointing towards the  $C_4$  atom of the isobutyl side chain group as a function of the center-of-mass distance from the silica surface. This figure is plotted by combining the corresponding orientation distribution profiles in all umbrella sampling windows.

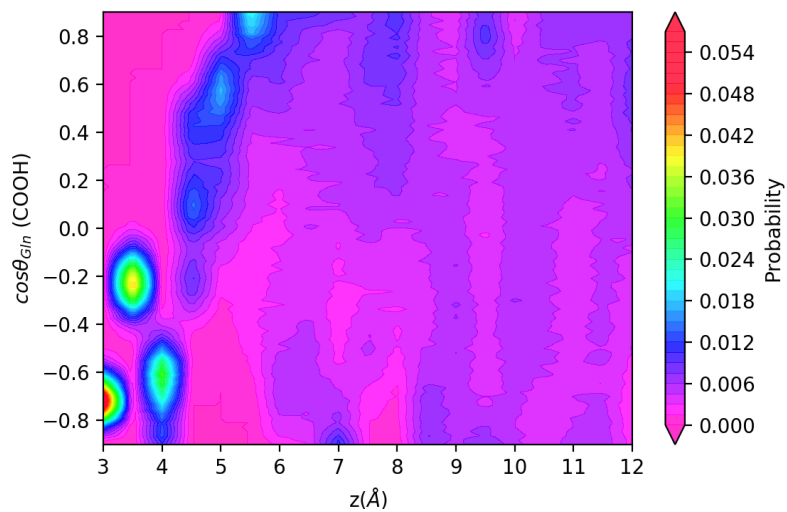



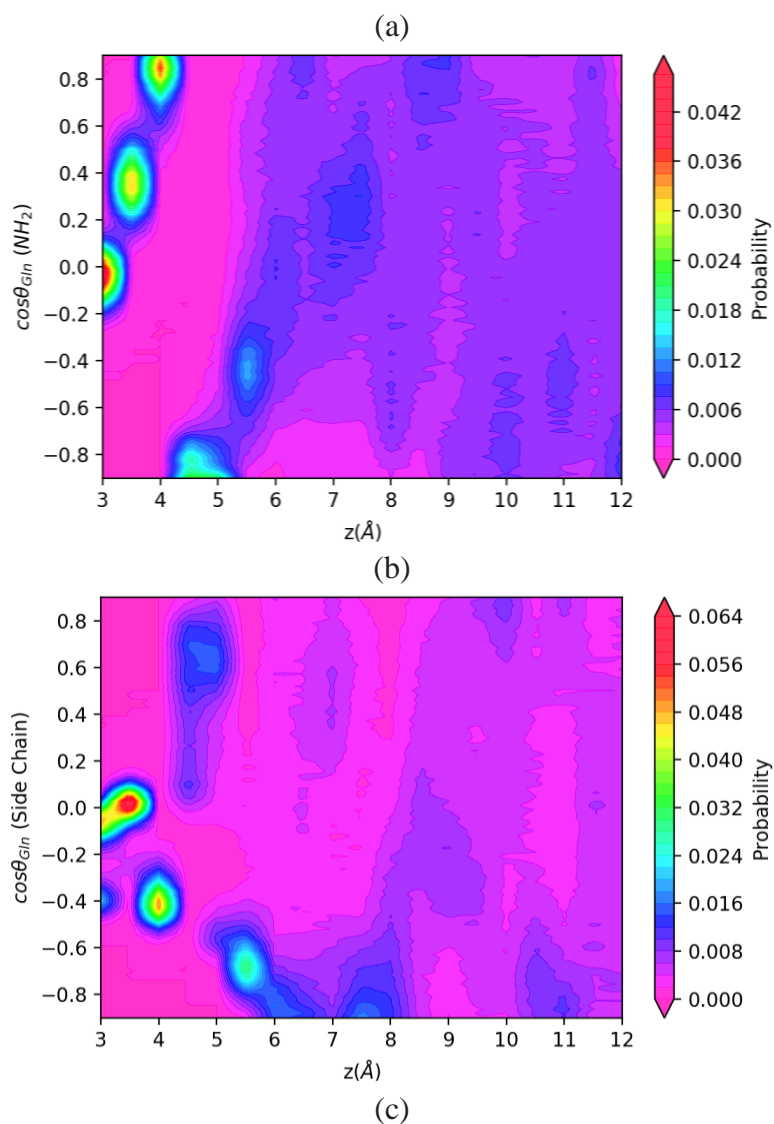

Figure S5. The orientation distribution of the Gln molecule's (a) C<sub>1</sub>-C<sub>2</sub> vector:  $\alpha$ -carbon atom C<sub>1</sub> pointing towards the C<sub>2</sub> atom of the carboxyl group, (b) C<sub>1</sub>-N<sub>1</sub> vector:  $\alpha$ -carbon atom C<sub>1</sub> pointing towards the N<sub>1</sub> atom of the amino group and (c) C<sub>1</sub>-N<sub>2</sub> vector:  $\alpha$ -carbon atom C<sub>1</sub> pointing towards the N<sub>2</sub> atom of the amide side chain group as a function of the center-of-mass distance from the silica surface. This figure is plotted by combining the corresponding orientation distribution profiles in all umbrella sampling windows.

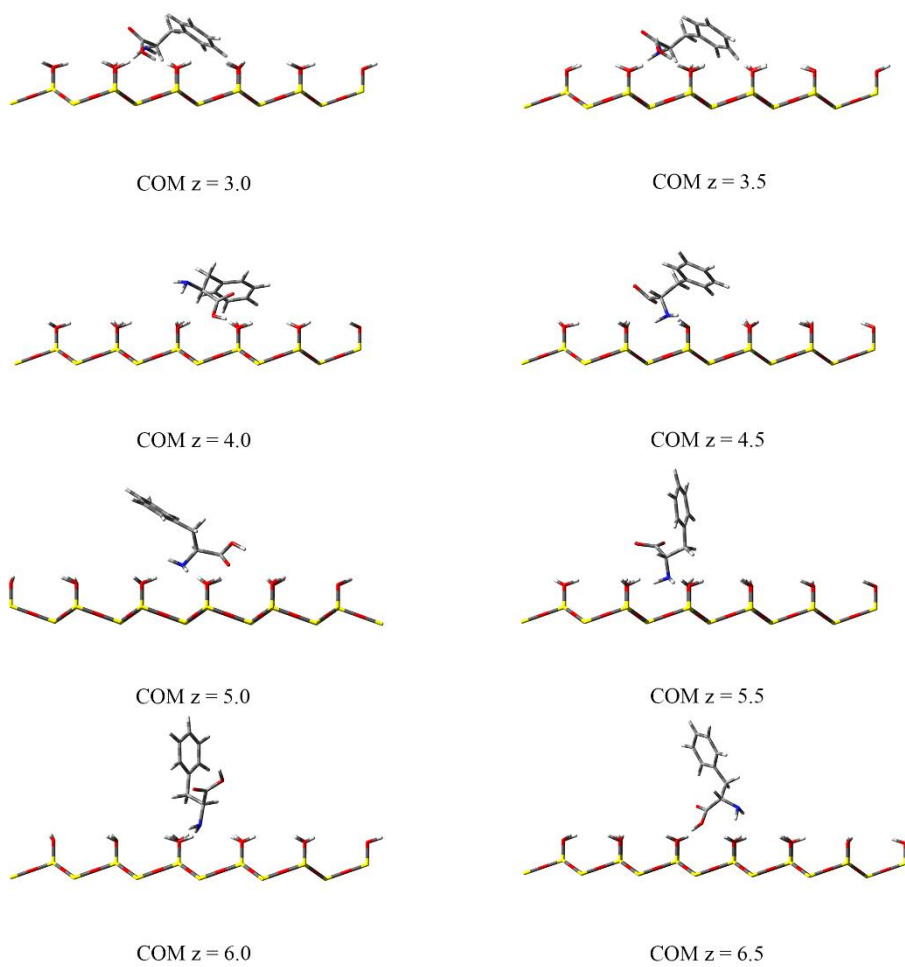

Figure S6. Typical configurations of Phe on the silica surface at the COM z position ranging from  $z = 3.0 \text{ \AA}$  to  $z = 6.5 \text{ \AA}$ . Acetonitrile (ACN) and water are not shown for clarity.

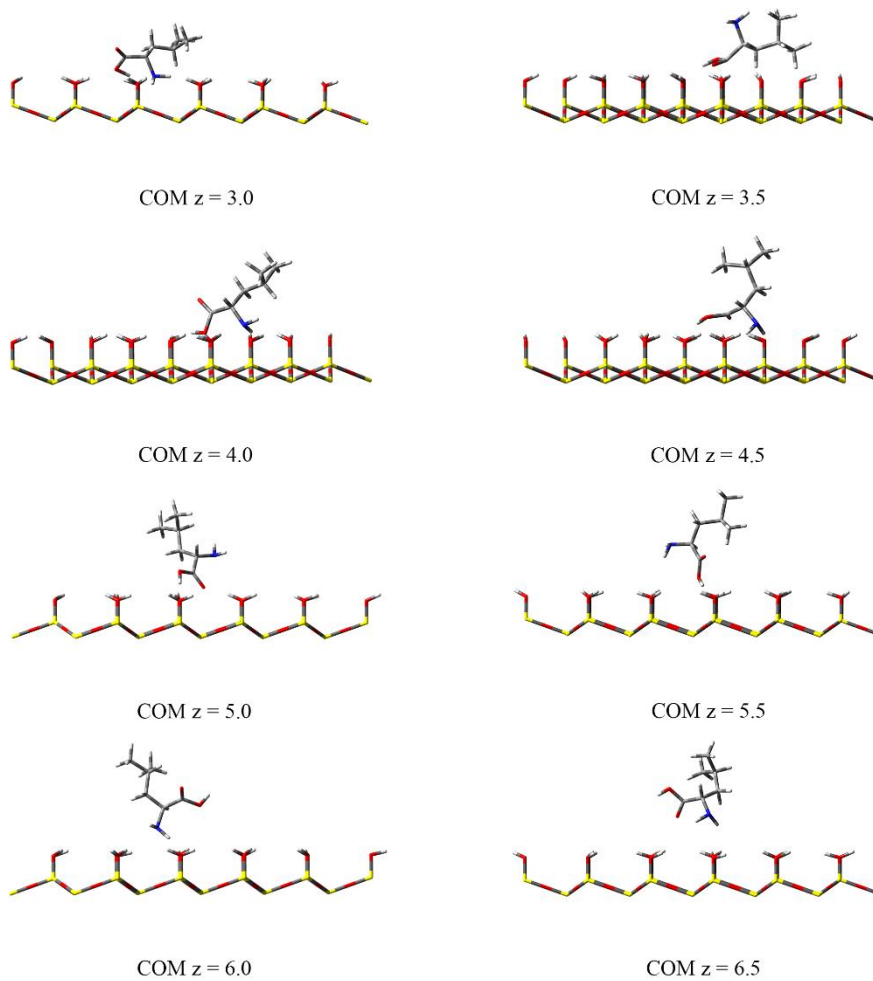

Figure S7. Typical configurations of Leu on the silica surface at the COM z position ranging from  $z = 3.0 \text{ \AA}$  to  $z = 6.5 \text{ \AA}$ . Acetonitrile (ACN) and water are not shown for clarity.

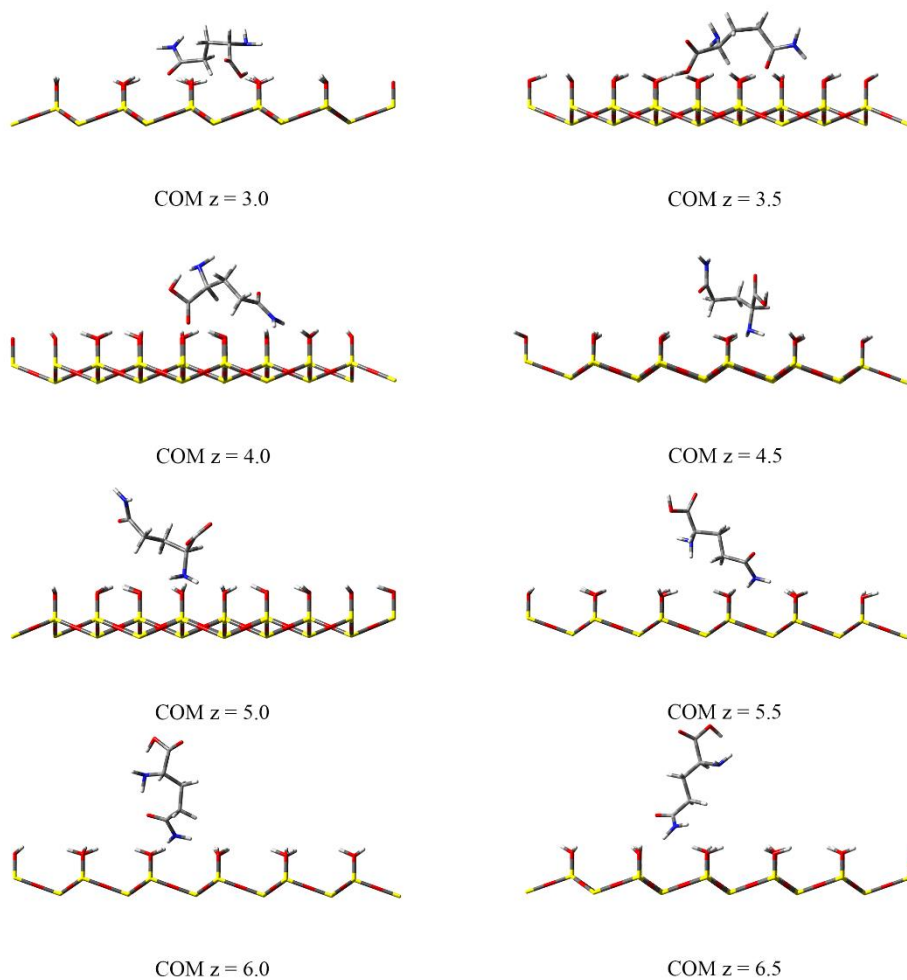

Figure S8. Typical configurations of Gln on the silica surface at the COM z position ranging from  $z = 3.0 \text{ \AA}$  to  $z = 6.5 \text{ \AA}$ . Acetonitrile (ACN) and water are not shown for clarity.

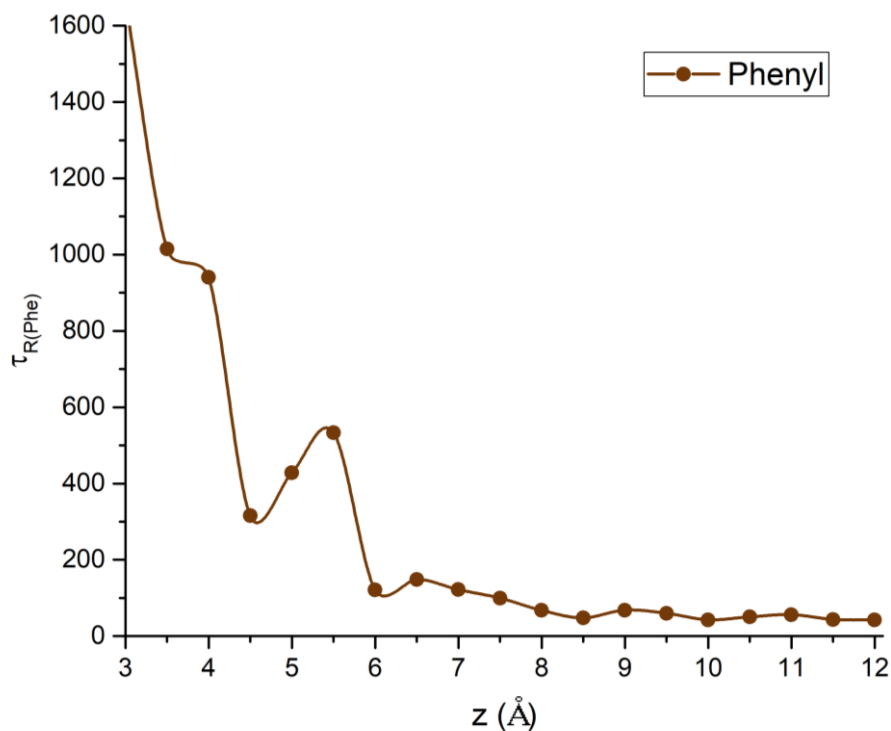

Figure S9. The rotational relaxation time  $\tau$  curve for the phenyl ring normal vector of the Phe molecule as a function of the  $z$  distance from the surface, with the definition of the vector shown in Figure 1a of the manuscript.

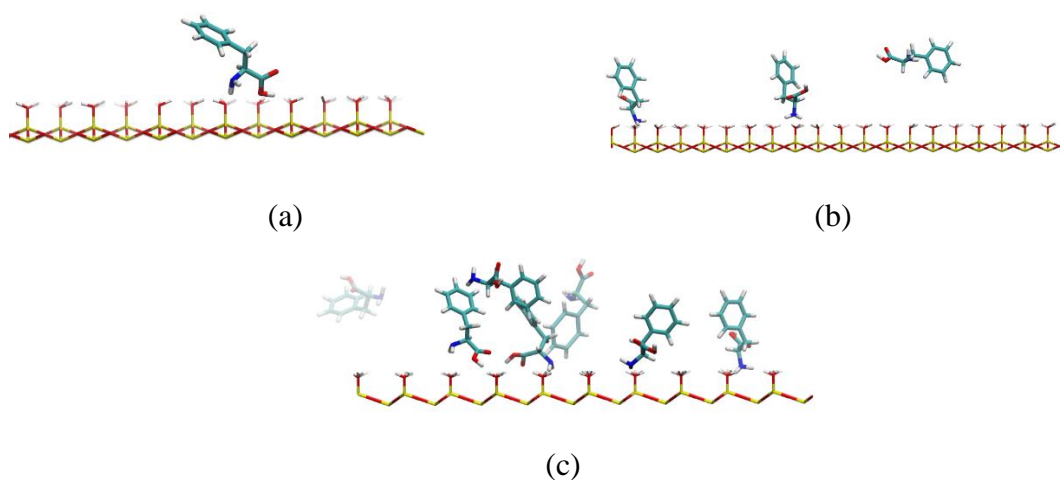

Figure S10. Typical configurations of Phe within 8 Å from the silica surface with different number of amino acid molecules (a) 10, (b) 30 and (c) 50.

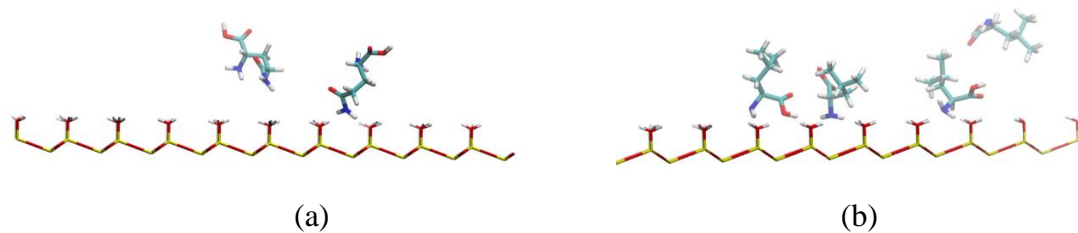

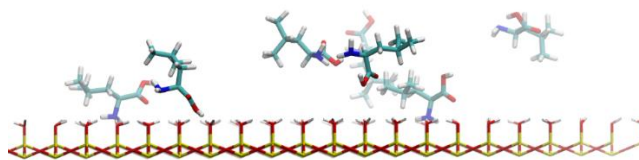

(c)

Figure S11. Typical configurations of Leu within 8 Å from the silica surface with different number of amino acid molecules (a) 10, (b) 30 and (c) 50.

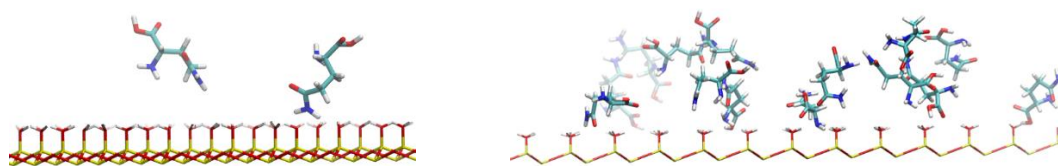

(a)

(b)

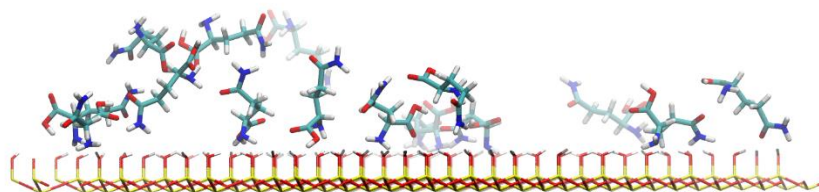

(c)

Figure S12. Typical configurations of Gln within 8 Å from the silica surface with different number of amino acid molecules (a) 10, (b) 30 and (c) 50.

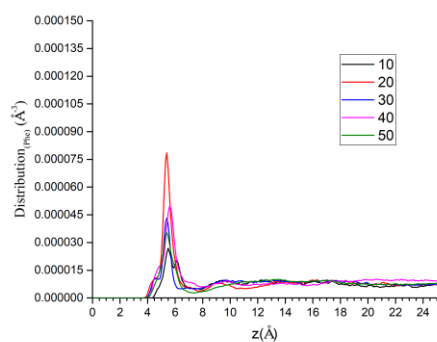

(a)

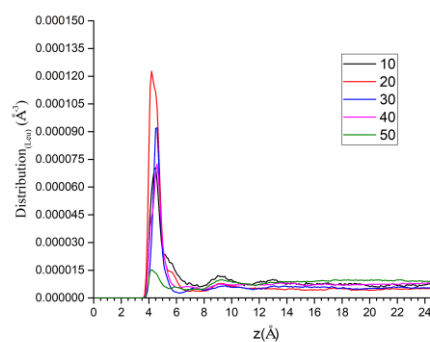

(b)

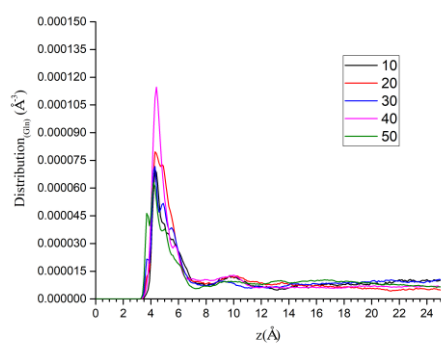

(c)

Figure S13. Spatial probability distribution functions of (a) Phe, (b) Leu and (c) Gln with different number of amino acid molecules. The spatial probability distribution is calculated via scaling the number density profiles by the number of amino acid molecules in the system.

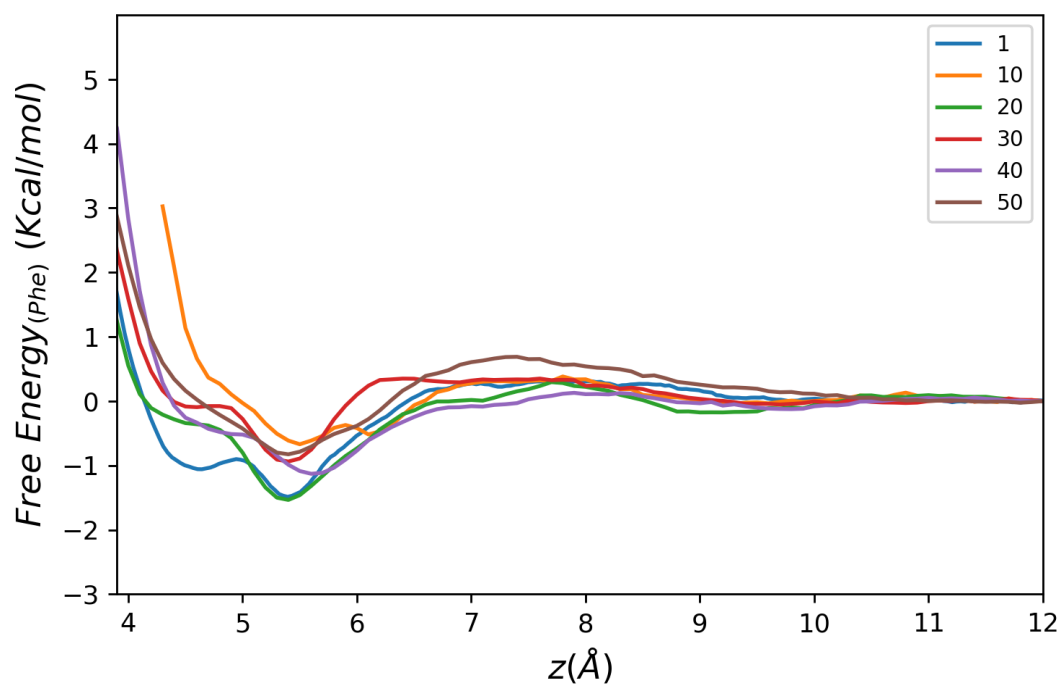

(a)

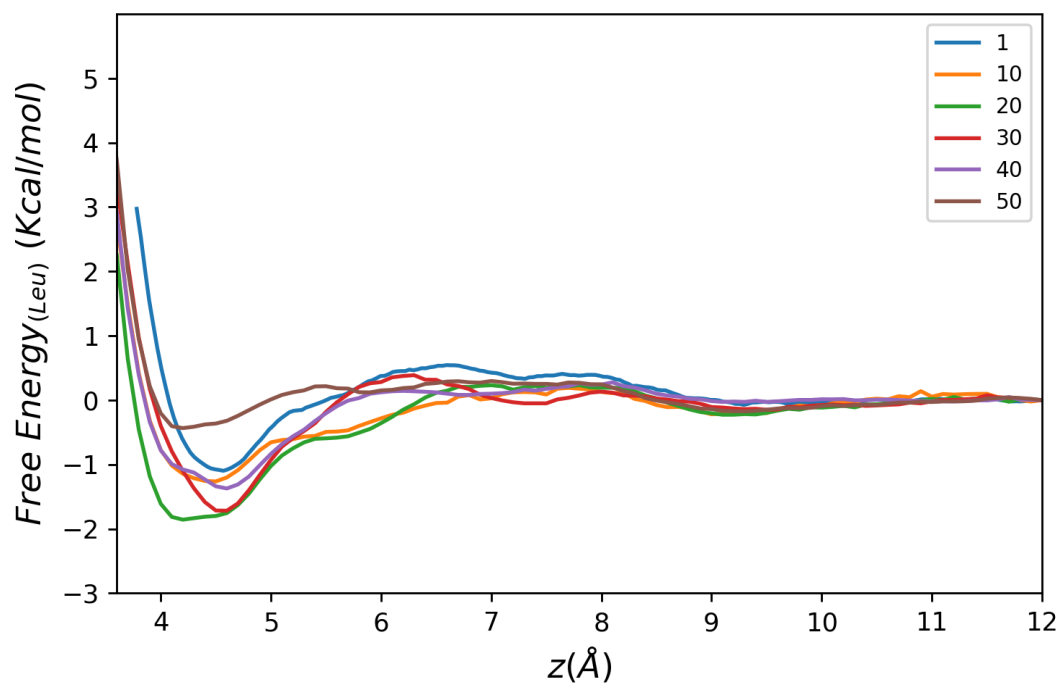

(b)

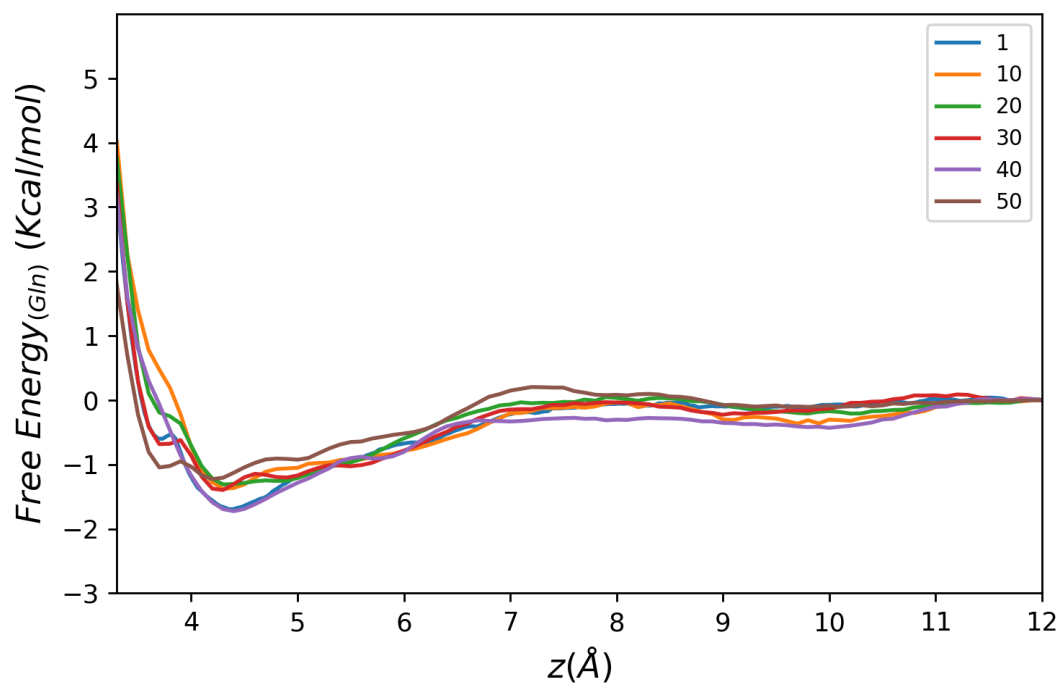

(c)

Figure S14. PMFs of (a) Phe, (b) Leu and (c) Gln with different number of amino acid molecules.



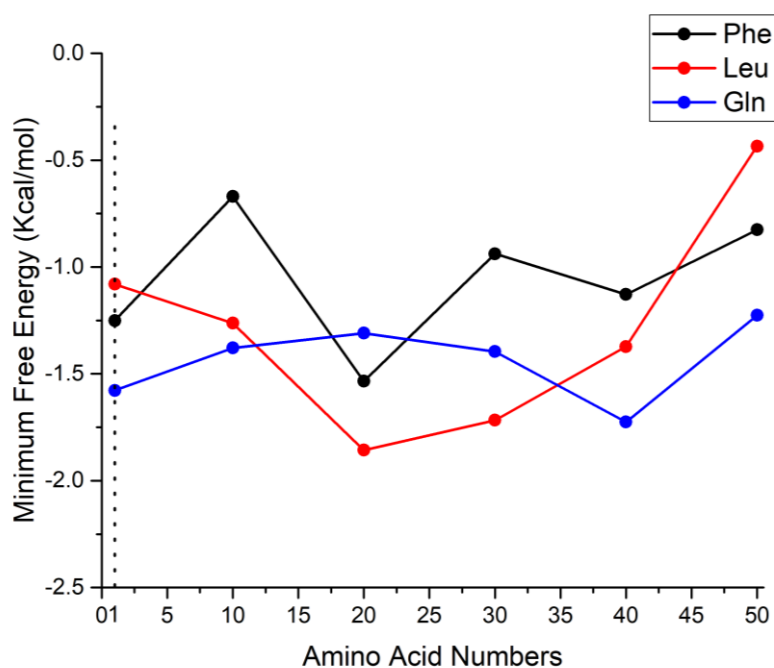

Figure S15. The minimums of the free energy of Phe (black line), Leu (red line) and Gln (blue line) molecules with different number of solute molecules in the water-ACN-silica system.

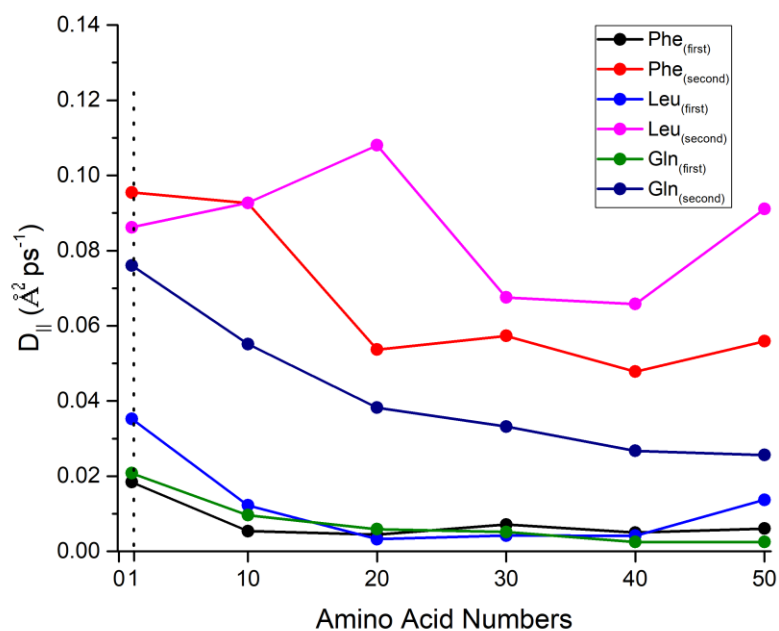

Figure S16. The parallel diffusion coefficients for systems with different number of solute molecules in the first layer ( $z = 3-7 \text{ \AA}$ , black line: the Phe molecule, blue line: the Leu molecule and green line: the Gln molecule) and second layer ( $z = 7-11 \text{ \AA}$ , red line: the Phe molecule, pink line: the Leu molecule and navy blue line: the Gln molecule).

## References

1. Wang, J. M.; Wolf, R. M.; Caldwell, J. W.; Kollman, P. A.; Case, D. A., Development and testing of a general amber force field. *Journal of computational chemistry* **2004**, *25* (9), 1157-1174.
2. Nikitin, A. M.; Lyubartsev, A. P., New six-site acetonitrile model for simulations of liquid acetonitrile and its aqueous mixtures. *Journal of computational chemistry* **2007**, *28* (12), 2020-6.
3. Jorgensen, W. L.; Chandrasekhar, J.; Madura, J. D.; Impey, R. W.; Klein, M. L., Comparison of simple potential functions for simulating liquid water. *J. Chem. Phys.* **1983**, *79* (2), 926-935.
4. Song Hi, L.; Rossky, P. J., A comparison of the structure and dynamics of liquid water at hydrophobic and hydrophilic surfaces-a molecular dynamics simulation study. *J. Chem. Phys.* **1994**, *100* (4), 3334-3345.
